# Supplementary material for: Sialic acids Neu5Ac and KDN in adipose tissue samples from individuals following habitual vegetarian or non-vegetarian dietary patterns
Source: PubMed Central journal article supplement (PMC10400564; doi:10.1038/s41598-023-38102-z), 2023-08-03
Supplement: 41598_2023_38102_MOESM1_ESM.pdf [file 41598_2023_38102_MOESM1_ESM.pdf]

## Supplementary Materials

### **Sialic Acids Neu5Ac and KDN in Adipose Tissues from Individuals Following Habitual Vegetarian and Non-Vegetarian Dietary Patterns**

**Gerardo N. Guerrero-Flores<sup>1,2</sup>, Fabio J. Pacheco<sup>1,3</sup>, Danilo S. Boskovic<sup>4</sup>, Sandaly O. S. Pacheco<sup>1,3</sup>, Guangyu Zhang<sup>4</sup>, Gary E. Fraser<sup>5,6,7</sup> and Fayth L. Miles<sup>4,5,6\*</sup>**

<sup>1</sup>Interdisciplinary Center for Research in Health and Behavioral Sciences, School of Medicine, Universidad Adventista del Plata, Libertador San Martín, Entre Ríos, 3103 Argentina

<sup>2</sup>Faculty of Medical Sciences, National University of Rosario (UNR), Rosario, 3100 Argentina

<sup>3</sup>Institute for Food Science and Nutrition, Universidad Adventista del Plata, Libertador San Martín, Entre Ríos, 3103 Argentina

<sup>4</sup>Division of Biochemistry, Department of Basic Sciences, School of Medicine, Loma Linda University, Loma Linda, CA, 92350 USA

<sup>5</sup>Center for Nutrition, Healthy Lifestyles and Disease Prevention, School of Public Health, Loma Linda University, Loma Linda, CA, 92350 USA

<sup>6</sup>Adventist Health Study, Loma Linda University, Loma Linda, CA 92350 USA

<sup>7</sup>Department of Medicine, School of Medicine, Loma Linda University, Loma Linda, CA 92350 USA

\*Corresponding author: [fmiles@llu.edu](mailto:fmiles@llu.edu)

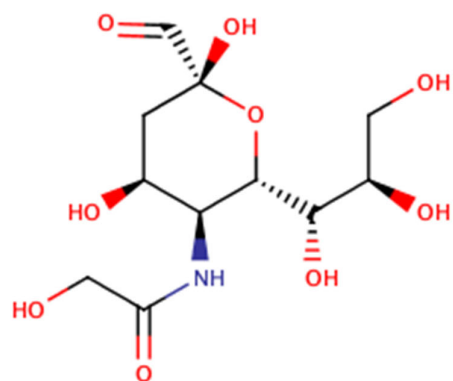

**N-glycolylneuraminic acid**

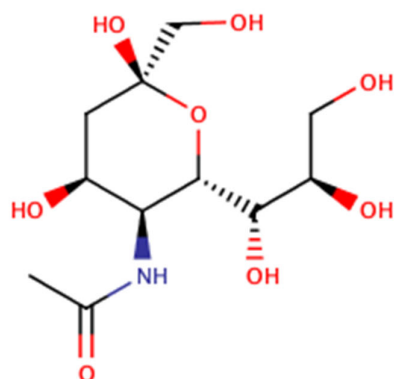

**N-acetylneuraminic acid**

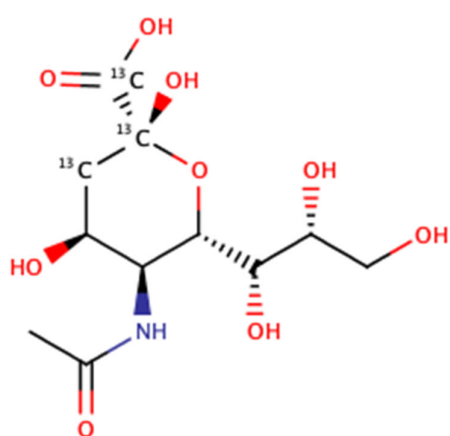

**N-Acetyl D neuraminic acid 1,2,3 <sup>13</sup>C<sub>3</sub>**

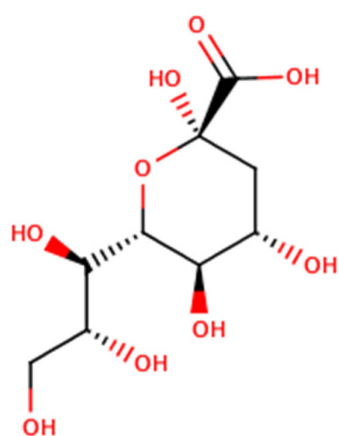

**Ketodeoxynonulosonic acid**

**Supplementary Figure S1.** Chemical structure of N-Glycolylneuraminic acid (Neu5Gc), N-Acetylneuraminic Acid (Neu5Ac), N-Acetyl-D-1,2,3-<sup>13</sup>C<sub>3</sub> neuraminic acid (Neu5Ac-D-1,2,3-<sup>13</sup>C<sub>3</sub>) and Ketodeoxynonulosonic acid (KDN).

\*Molecules were drawn and checked with the software MarvinSketch (version 22.13, academic package, ChemAxon).

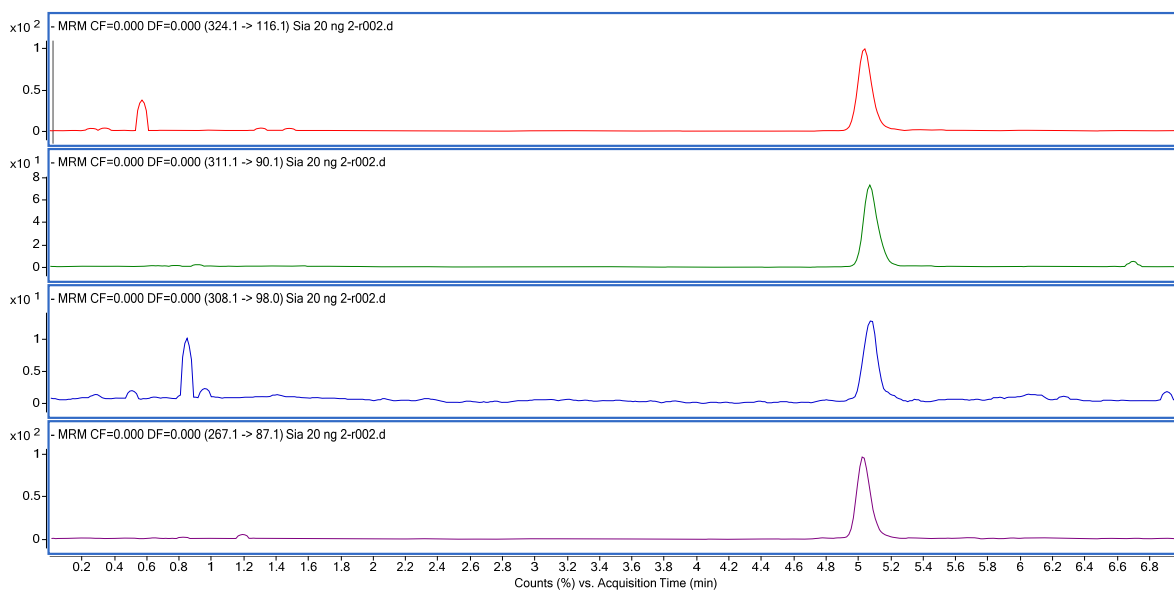

**Supplementary Figure S2.** HPLC chromatograms for quantification of Neu5Gc, Neu5Ac-D-1,2,3- $^{13}\text{C}_3$ , Neu5Ac, and KDN content (20 ng/mL, each standard).

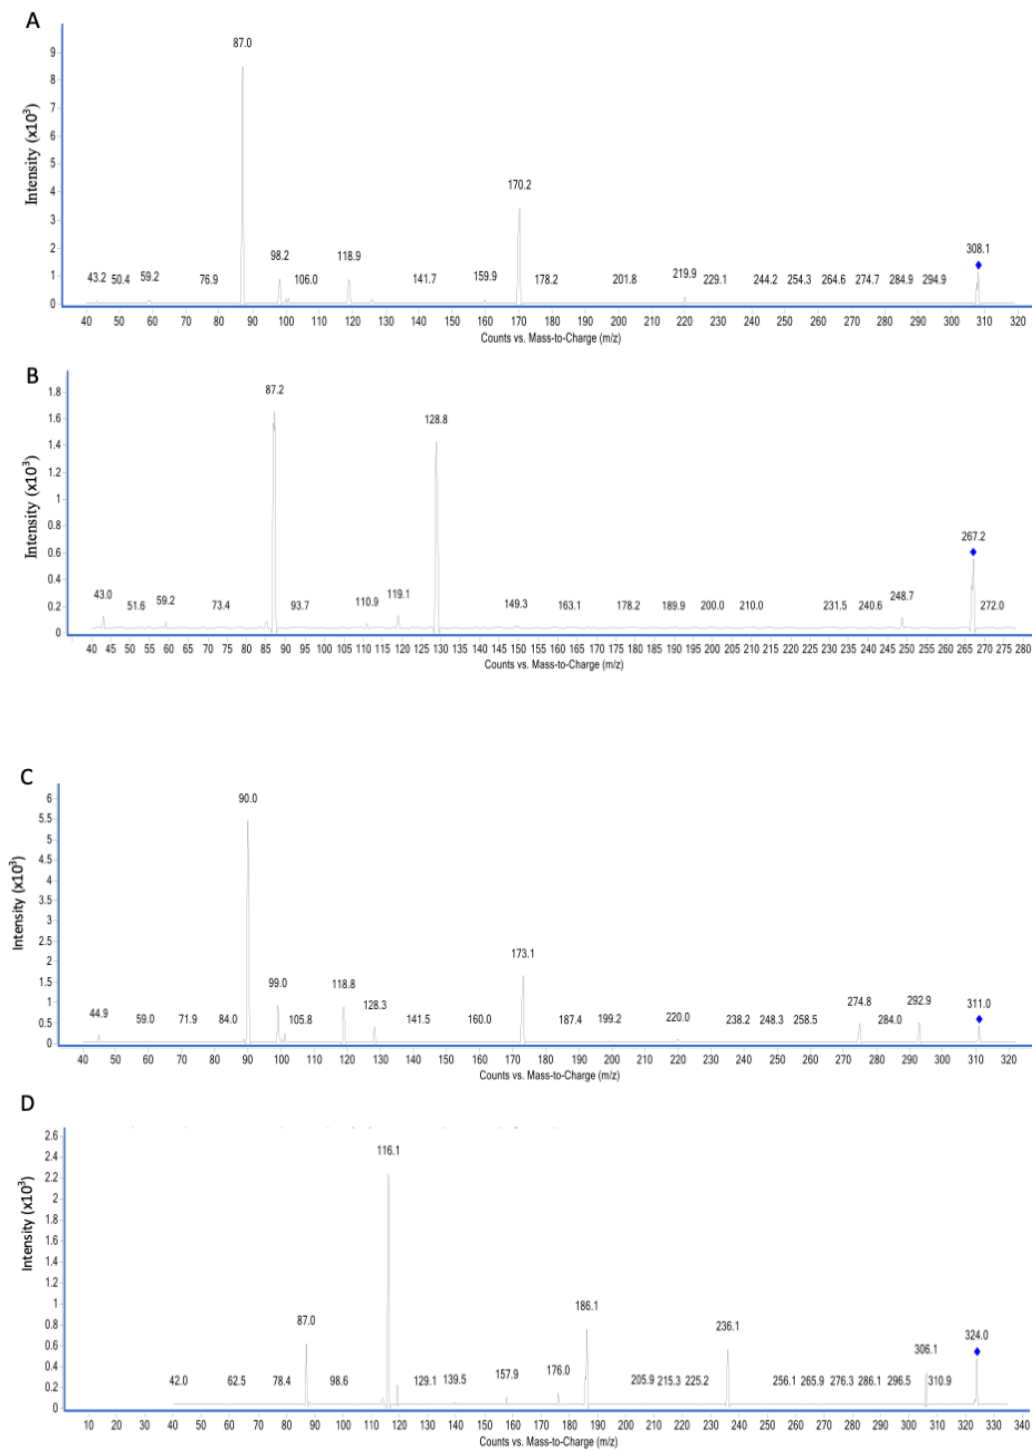

**Supplementary Figure S3.** Negative ionization electrospray mass spectra of the parent and daughter ion. A) Neu5Ac at  $m/z$  87.0 with  $m/z$  308.0 as the parent ion; B) KDN at  $m/z$  87.2, with  $m/z$  267.2 as the parent ion; C) Neu5Ac-D-1,2,3-<sup>13</sup>C<sub>3</sub> at  $m/z$  90.0 with  $m/z$  311.0 as the parent ion; D) Neu5Gc at  $m/z$  116.1, with  $m/z$  324.0 as the parent ion.

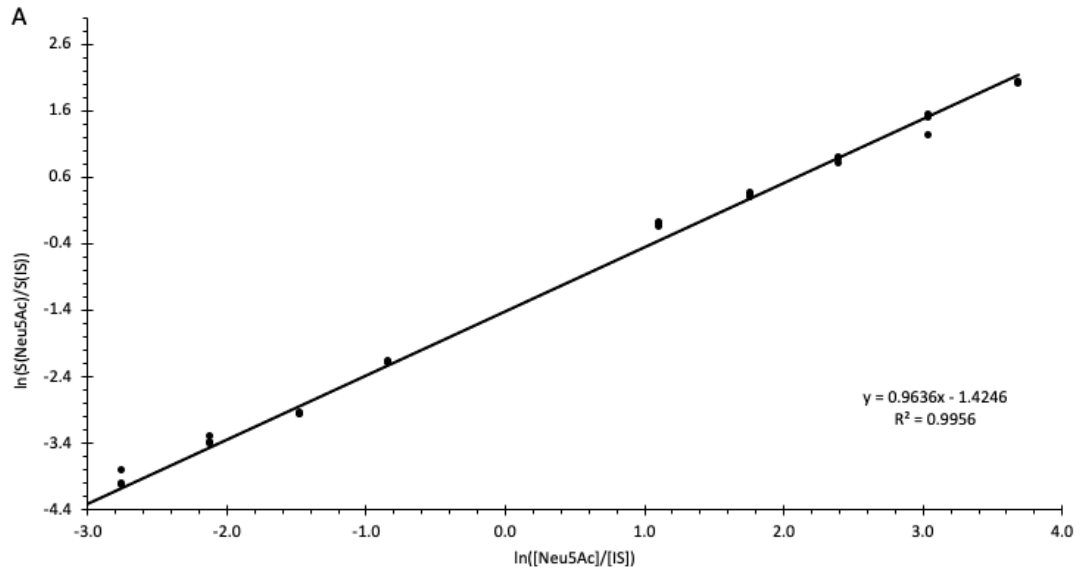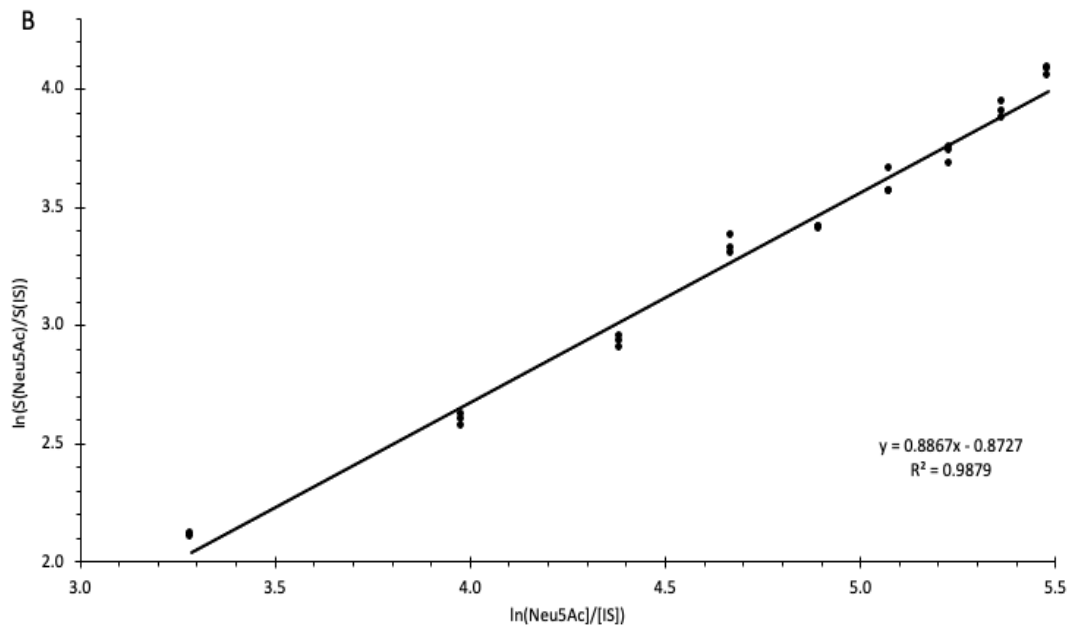

C

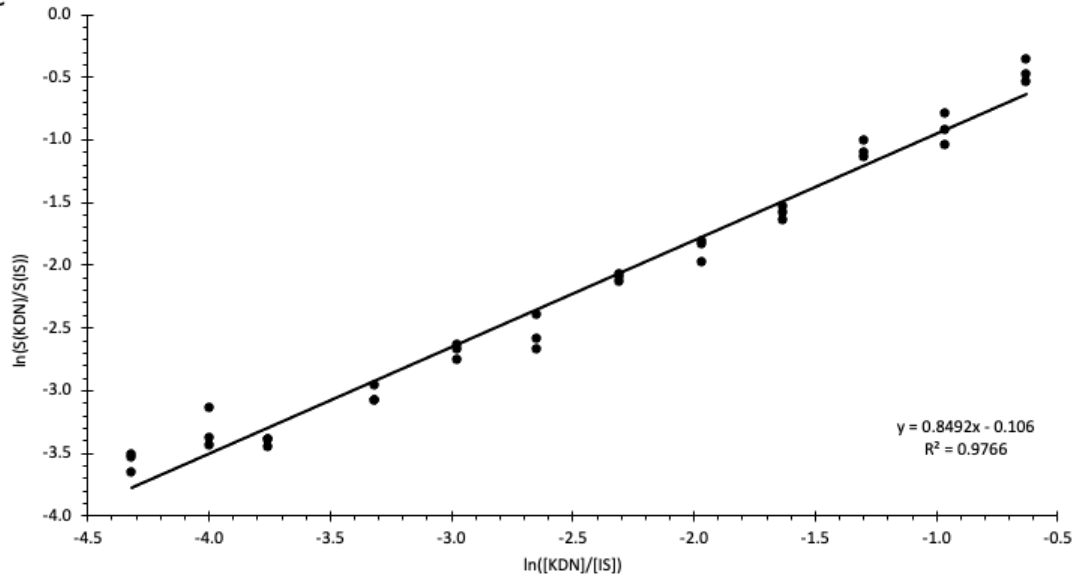

D

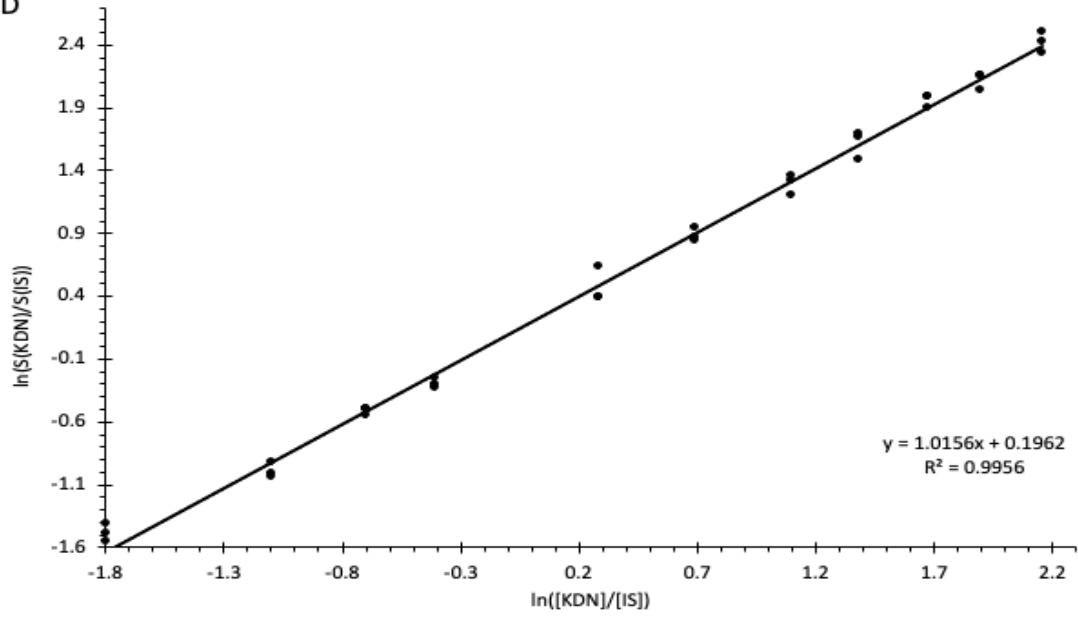

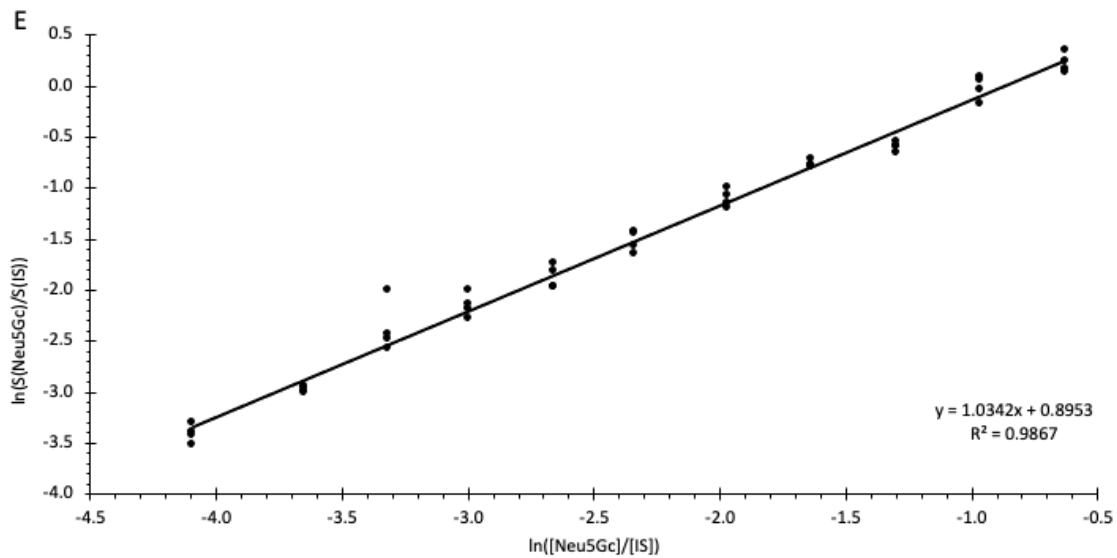

**Supplementary Figure S4.** The standard curves for the LC–MS/MS method for Sia quantitation, as a function of the ratios of the Neu5Ac (A-B), KDN (C-D), or Neu5Gc (E) concentrations to the concentration of the internal standard Neu5Ac-D-1,2,3- $^{13}\text{C}_3$  (IS).

The above standard lines were used to obtain respective inverse line equations as follows:

$$\ln\left(\frac{[\text{Neu5Ac}]}{[\text{IS}]}\right) = 1.0378 * \ln\left(\frac{S(\text{Neu5Ac})}{S(\text{IS})}\right) + 1.4784 \quad (\text{A})$$

$$\ln\left(\frac{[\text{Neu5Ac}]}{[\text{IS}]}\right) = 1.1277 * \ln\left(\frac{S(\text{Neu5Ac})}{S(\text{IS})}\right) + 0.9842 \quad (\text{B})$$

$$\ln\left(\frac{[\text{KDN}]}{[\text{IS}]}\right) = 1.1776 * \ln\left(\frac{S(\text{KDN})}{S(\text{IS})}\right) + 0.1248 \quad (\text{C})$$

$$\ln\left(\frac{[\text{KDN}]}{[\text{IS}]}\right) = 0.9847 * \ln\left(\frac{S(\text{KDN})}{S(\text{IS})}\right) - 0.1932 \quad (\text{D})$$

$$\ln\left(\frac{[\text{Neu5Gc}]}{[\text{IS}]}\right) = 0.9669 * \ln\left(\frac{S(\text{Neu5Gc})}{S(\text{IS})}\right) - 0.8657 \quad (\text{E})$$

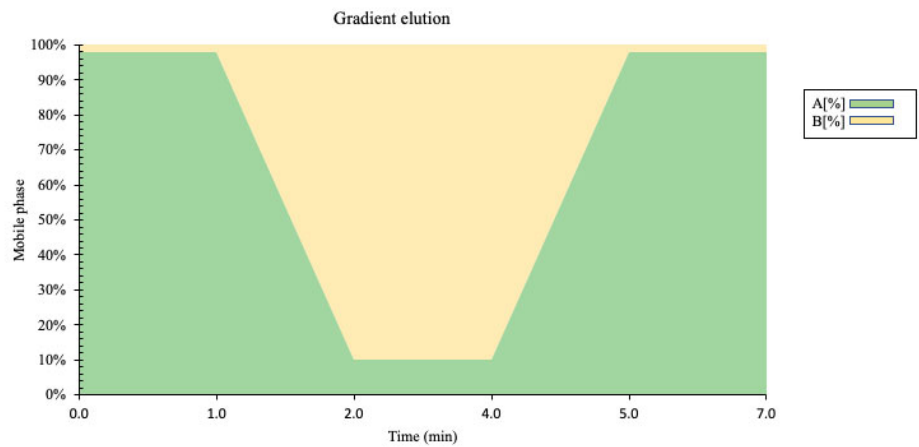

**Supplementary Figure S5.** HPLC gradient profile for the chromatographic separation of Sias. A= 10% ammonium formate in water; B= 10% ammonium formate in acetonitrile.



**Supplementary Table S1.** HPLC gradient profile for the chromatographic separation of Sias.

| <b>Time</b> | <b>Solvent A</b> | <b>Solvent B</b> | <b>Flow</b>  | <b>Pressure</b> |
|-------------|------------------|------------------|--------------|-----------------|
| 0.00 min    | 98.0 %           | 2.0 %            | 0.300 mL/min | 400.00 bar      |
| 1.00 min    | 98.0 %           | 2.0 %            | 0.300 mL/min | 400.00 bar      |
| 2.00 min    | 10.0 %           | 90.0 %           | 0.300 mL/min | 400.00 bar      |
| 4.00 min    | 10.0 %           | 90.0 %           | 0.300 mL/min | 400.00 bar      |
| 5.00 min    | 98.0 %           | 2.0 %            | 0.300 mL/min | 400.00 bar      |
| 7.00 min    | 98.0 %           | 2.0 %            | 0.300 mL/min | 400.00 bar      |

A = 10% ammonium formate in water; B = 10% ammonium formate in acetonitrile.

**Supplementary Table S2.** Parameters of the LC-MS/MS method for qualitative and quantitative determination of Neu5Gc, Neu5Ac, KDN and, Neu5Ac-D-1,2,3-<sup>13</sup>C<sub>3</sub>

| Analyte                                      | Retention time | Precursor ion ( <i>m/z</i> ) | Product ions ( <i>m/z</i> ) | Frag (V) | Collision energy (eV) | Quantitation transition |
|----------------------------------------------|----------------|------------------------------|-----------------------------|----------|-----------------------|-------------------------|
| Neu5Gc                                       | 5.036          | 324.1                        | 116.1                       | 110      | 14                    | 324.1 → 116.1           |
| Neu5Ac                                       | 5.079          | 308.1                        | 98                          | 100      | 18                    | 308.1 → 98              |
| KDN                                          | 5.028          | 267.1                        | 87.1                        | 90       | 14                    | 267.1 → 87.1            |
| Neu5Ac-D-1,2,3- <sup>13</sup> C <sub>3</sub> | 4.994          | 311.1                        | 90.1                        | 90       | 12                    | 311.1 → 90.1            |

**Supplementary Table S3.** Contents of total sialic acids in animal adipose tissue ( $\mu\text{g}/\text{mg}$ ).

| Animal samples<br><i>n</i> =3 | Neu5Ac |          | KDN  |          | Neu5Gc |          | Total |          |
|-------------------------------|--------|----------|------|----------|--------|----------|-------|----------|
|                               | mean   | $\pm$ SD | mean | $\pm$ SD | mean   | $\pm$ SD | mean  | $\pm$ SD |
| Chicken                       | 2.18   | 0.37     | 0.26 | 0.04     | -      | -        | 2.44  | 0.37     |
| Pork                          | 4.68   | 0.39     | 0.32 | 0.02     | 0.67   | 0.03     | 5.67  | 0.39     |
| Lamb                          | 2.78   | 0.33     | 0.28 | 0.06     | 0.54   | 0.04     | 3.60  | 0.34     |
| Cow                           | 3.13   | 0.56     | 0.11 | 0.10     | 1.73   | 0.16     | 4.97  | 0.59     |
